# Supplementary material for: Serum microRNA Expression Profiling in Malaria Patients and Bioinformatic Analysis of Hsa-miR-106b-5p
Source: Research Square preprint supplement (doi:10.21203/rs.3.rs-680474/v1), 2021-07-19
Supplement: Supplementary file 1 [file 19b876168d3d96a1a8da51b5.xlsx]

## Sheet: Additional file 1
Additional file 1. Differential expression miRNA in the Plasmodium-infected group compared with the normal control group
Differential expression types	miRNA	Fold change	logFC
Up-regulated	miR-106b	14.8707	3.8944
	miR-125b-3p	8.62733	3.10891
	miR-365	8.52302	3.09137
	miR-376c	4.66847	2.22295
	miR-489	4.48484	2.16505
	miR-363-3p	4.26715	2.09327
	miR-378	4.21716	2.07627
	miR-29b	4.19809	2.06973
	miR-202*	3.99901	1.99964
	let-7i	3.89343	1.96104
	miR-30c-1*	3.58628	1.84249
	miR-144	3.42332	1.7754
	miR-93	3.33426	1.73737
	miR-22*	3.09654	1.63066
	miR-493*	3.02805	1.59839
	miR-19a	2.99278	1.58149
	miR-221	2.8132	1.49221
	miR-483-3p	2.81071	1.49093
	miR-150	2.76549	1.46753
	let-7g*	2.72282	1.4451
	miR-32	2.68502	1.42493
	miR-324-3p	2.55379	1.35264
	miR-24	2.50327	1.32381
	miR-29c	2.26583	1.18004
	miR-21	2.22936	1.15663
	miR-22	2.228	1.15575
	miR-501-3p	2.19569	1.13467
Down-regulated	miR-33b*	0.49725	-1.00796
	miR-497	0.488733	-1.03288
	miR-526a	0.4274	-1.22634
	miR-99b*	0.415114	-1.26842
	miR-499-3p	0.387766	-1.36674
	miR-762	0.376652	-1.4087
	miR-769-3p	0.374174	-1.41822
	miR-329	0.37409	-1.41854
	miR-375	0.358637	-1.4794
	miR-659	0.357526	-1.48388
	miR-183*	0.356342	-1.48867
	miR-214	0.346705	-1.52822
	miR-195*	0.345738	-1.53225
	miR-499-5p	0.34076	-1.55317
	miR-663	0.337753	-1.56596
	miR-497*	0.336585	-1.57096
	miR-638	0.331466	-1.59307
	miR-770-5p	0.322953	-1.6306
	miR-298	0.313901	-1.67162
	miR-519a*	0.311341	-1.68343
	miR-2861	0.308038	-1.69882
	miR-524-5p	0.294292	-1.76468
	let-7e	0.294038	-1.76593
	miR-107	0.278527	-1.84411
	miR-381	0.274991	-1.86254
	miR-202	0.271906	-1.87882
	miR-623	0.268334	-1.8979
	miR-20b	0.265355	-1.914
	miR-586	0.256021	-1.96567
	miR-186*	0.244179	-2.03399
	miR-33b	0.242665	-2.04296
	miR-148a*	0.237277	-2.07536
	miR-300	0.234109	-2.09475
	miR-572	0.224116	-2.15768
	miR-452-5p	0.222519	-2.168
	miR-658	0.117493	-3.08936
	miR-508-5p	0.104689	-3.25582
*Fold change is the ratio of serum miRNA expression level in the Plasmodium infection group to that in the normal control group. The result is kept to 3 decimal places.
